# Supplementary material
Source: Springer Nature journal article supplement (https://www.springermedizin.de/resource/supplementary/13014_2013_1224_MOESM5_ESM.pdf/9635184)

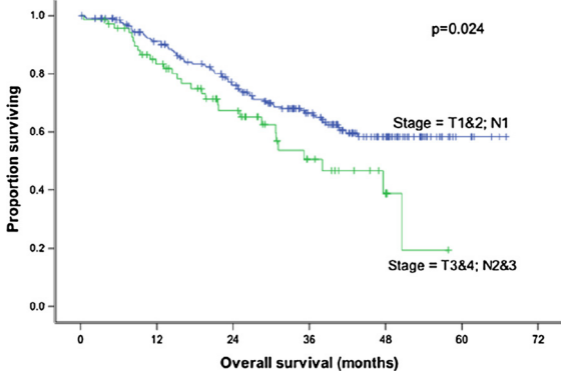

|          |     |     |     |    |    |   |   |
|----------|-----|-----|-----|----|----|---|---|
| T1&2; N1 | 203 | 170 | 130 | 87 | 38 | 6 | 0 |
|----------|-----|-----|-----|----|----|---|---|

|            |    |    |    |    |   |     |     |
|------------|----|----|----|----|---|-----|-----|
| T3&4; N2&3 | 70 | 52 | 33 | 14 | 5 | --- | --- |
|------------|----|----|----|----|---|-----|-----|

Supplement: MOESM5 [file 9635184]
